# Supplementary material for: Emerging investigator series: transformation of common antibiotics during water disinfection with chlorine and formation of antibacterially active products
Source: Royal Society of Chemistry journal article supplement (doi:10.1039/c9ew00182d), 2019-01-01
Supplement: c9ew00182d1.pdf [file c9ew00182d1.pdf]

### Supplemental Information

Transformation of common antibiotics during water disinfection with chlorine and formation of antibacterially active products.

Nicole L. Kennedy Neth<sup>a</sup>, Clifford M. Carlin<sup>b</sup>, and Olya S. Keen<sup>a,#</sup>

<sup>a</sup> University of North Carolina at Charlotte, Department of Civil and Environmental Engineering

<sup>b</sup> University of North Carolina at Charlotte, Department of Chemistry

<sup>#</sup>corresponding author: okeen@uncc.edu, 704-687-5048

9201 University City Blvd, EPIC 3355

Charlotte, NC 28223

Table S1. CT values for selected antibiotics

| Antibiotic                    | CT Value                   |         |                       |         |
|-------------------------------|----------------------------|---------|-----------------------|---------|
|                               | Ultrapure water (mg-min/L) |         | Wastewater (mg-min/L) |         |
|                               | 10 min                     | 120 min | 10 min                | 120 min |
| Ciprofloxacin                 | 14.8                       | 140     | 17.9                  | 71.3    |
| Levofloxacin                  | 6.7                        | 36.8    | 20.6                  | 72.4    |
| Ofloxacin                     | 12.5                       | 75.2    | 20.0                  | 96.9    |
| Trimethoprim                  | 11.7                       | 67.0    | 31.0                  | 106.4   |
| Sulfamethoxazole              | 16.9                       | 192     | 17.8                  | 81.0    |
| Sulfamethoxazole/Trimethoprim | 17.3                       | 188     | 17.8                  | 70.8    |

Table S2. Summary of antibiotics used, including initial concentration, initial chlorine concentration, and residual chlorine for both ultrapure water and wastewater. Error represents standard deviation from three repeated experiments.

| Antibiotic | Antibiotic Initial concentration (mg/L) | Initial chlorine concentration (mg/L) |            | Residual Chlorine (mg/L as Cl <sub>2</sub> ) |       |            |       |
|------------|-----------------------------------------|---------------------------------------|------------|----------------------------------------------|-------|------------|-------|
|            |                                         | Ultrapure water                       | Wastewater | Ultrapure water                              | error | Wastewater | error |
| CIP        | 2.33                                    | 2.0                                   | 6.5        | 0.99                                         | 0.02  | 0.23       | 0.02  |
| LVF        | 2.0                                     | 3.0                                   | 7.0        | 0.22                                         | 0.05  | 0.25       | 0.01  |
| OFL        | 2.0                                     | 3.0                                   | 7.0        | 0.46                                         | 0.03  | 0.33       | 0.01  |
| TMP        | 20                                      | 5.0                                   | 10         | 0.33                                         | 0.02  | 0.21       | 0.01  |
| SMX        | 2.0                                     | 2.0                                   | 5.0        | 1.55                                         | 0.03  | 0.34       | 0.09  |
| SMX/TMP    | 2.0/0.4                                 | 2.0                                   | 5.0        | 1.44                                         | 0.03  | 0.23       | 0.02  |

Ciprofloxacin (CIP), Levofloxacin (LVF), Ofloxacin (OFL), Trimethoprim (TMP), Sulfamethoxazole (SMX), Sulfamethoxazole/Trimethoprim (SMX/TMP)

Table S3. Antibiotics and their respective pK<sub>a</sub> values

| Antibiotic       | pK <sub>a1</sub> | pK <sub>a2</sub> | Reference |
|------------------|------------------|------------------|-----------|
| ciprofloxacin    | 4.34             | 10.03            | 1         |
| sulfamethoxazole | 1.6              | 5.7              | 2         |
| trimethoprim     | 7.12             | -                | 3         |
| levofloxacin     | 5.59             | 7.94             | 1         |
| ofloxacin*       | 5.56             | 7.94             | 1         |

\*Reflects pK<sub>a</sub> values of ofloxacin components: levofloxacin and dextroflaxacin

Table S4. The parent compounds of levofloxacin or dextroflaxacin (component of ofloxacin), both *m/z* 362.

| <i>m/z</i> | RT   | Chlorine | Levofloxacin                                                                      | Dextroflaxacin                                                                     |
|------------|------|----------|-----------------------------------------------------------------------------------|------------------------------------------------------------------------------------|
| 362        | 3.27 | 0        | 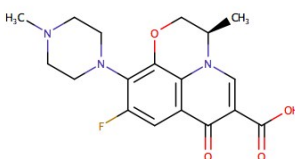 |  |

### References:

1. Singh, B. K.; Parwate, D. V.; Shukla, S. K., Rapid Color Test Identification System for Screening of Counterfeit Fluoroquinolone. *E-Journal of Chemistry* **2009**, *6* (2), 377-384.
2. Boreen, A. L.; Arnold, W. A.; McNeill, K., Photochemical fate of sulfa drugs in the aquatic environment: sulfa drugs containing five-membered heterocyclic groups. *Environmental science & technology* **2004**, *38* (14), 3933-3940.
3. Perrin, D. D., *Dissociation constants of organic bases in aqueous solution: supplement 1972*. Butterworths: 1972.
